# Supplementary material for: Detecting and Removing Inconsistencies between Experimental Data and Signaling Network Topologies Using Integer Linear Programming on Interaction Graphs
Source: PubMed Central journal article supplement (PMC3764019; doi:10.1371/journal.pcbi.1003204), 2013-09-05
Supplement: pcbi.1003204.s003.pdf [file pcbi.1003204.s003.pdf]

|                 | #reactions     | #signals   | #scenarios | #inputs    | SCEN_FIT |              |              |              | MCoS       |            |              |              |               |
|-----------------|----------------|------------|------------|------------|----------|--------------|--------------|--------------|------------|------------|--------------|--------------|---------------|
|                 |                |            |            |            | CPU time | #variables   | #constraints | #solutions   | CPU time   | #variables | #constraints | #solutions   |               |
| Single Solution | EGFR data      | 18         | 11         | 1          | 2        | <0.01        | 179          | 368.75       | 1          | <0.01      | 207          | 369.75       | 1             |
|                 |                | 32         | 11         | 1          | 2        | <0.01        | 292          | 608.75       | 1          | 0.01       | 330          | 609.75       | 1             |
|                 |                | 42         | 11         | 1          | 2        | <0.01        | 377          | 788.75       | 1          | 0.01       | 425          | 789.75       | 1             |
|                 |                | 67         | 11         | 1          | 2        | 0.01         | 597          | 1253.75      | 1          | 0.04       | 657          | 1254.75      | 1             |
|                 | random data    | 18         | 11         | 1          | 2        | <0.01        | 179          | 368.75       | 1          | <0.01      | 207          | 369.75       | 1             |
|                 |                | 32         | 11         | 1          | 2        | <0.01        | 292          | 608.75       | 1          | 0.01       | 330          | 609.75       | 1             |
|                 |                | 42         | 11         | 1          | 2        | <0.01        | 377          | 788.75       | 1          | 0.01       | 425          | 789.75       | 1             |
|                 |                | 67         | 11         | 1          | 2        | 0.01         | 597          | 1253.75      | 1          | 0.04       | 657          | 1254.75      | 1             |
|                 | more signals   | 18         | 13         | 1          | 2        | <0.01        | 181          | 372.75       | 1          | <0.01      | 209          | 373.75       | 1             |
|                 |                | 32         | 18         | 1          | 2        | <0.01        | 299          | 622.75       | 1          | <0.01      | 337          | 623.75       | 1             |
|                 |                | 42         | 23         | 1          | 2        | <0.01        | 389          | 812.75       | 1          | <0.01      | 437          | 813.75       | 1             |
|                 |                | 67         | 38         | 1          | 2        | <0.01        | 624          | 1307.75      | 1          | <0.01      | 702          | 1308.75      | 1             |
| Enumeration     | EGFR data      | 18         | 11         | 1          | 2        | <0.01        | 179          | 368.75       | 1          | <0.01      | 207          | 369.87       | 1.06          |
|                 |                | 32         | 11         | 1          | 2        | <0.01        | 292          | 608.75       | 1          | <0.01      | 330          | 611.06       | 1.87          |
|                 |                | 42         | 11         | 1          | 2        | <0.01        | 377          | 788.75       | 1          | 0.02       | 425          | 791.12       | 1.93          |
|                 |                | 67         | 11         | 1          | 2        | <0.01        | 597          | 1253.75      | 1          | 0.16       | 675          | 1258.44      | 4.06          |
|                 | random data    | 18         | 11         | 1          | 2        | <0.01        | 179          | 368.75       | 1          | <0.01      | 207          | 371.812      | 2.56          |
|                 |                | 32         | 11         | 1          | 2        | <0.01        | 292          | 608.75       | 1          | 0.05       | 330          | 616.56       | 7.06          |
|                 |                | 42         | 11         | 1          | 2        | <0.01        | 377          | 788.75       | 1          | 0.29       | 425          | 806.81       | 17.12         |
|                 |                | 67         | 11         | 1          | 2        | 0.01         | 597          | 1253.75      | 1          | 3.36       | 675          | 1298.06      | 43.31         |
|                 | more signals   | 18         | 13         | 1          | 2        | <0.01        | 181          | 372.75       | 1          | <0.01      | 209          | 373.75       | 1             |
|                 |                | 32         | 18         | 1          | 2        | <0.01        | 299          | 622.75       | 1          | <0.01      | 337          | 623.75       | 1             |
|                 |                | 42         | 23         | 1          | 2        | <0.01        | 389          | 812.75       | 1          | <0.01      | 437          | 813.75       | 1             |
|                 |                | 67         | 38         | 1          | 2        | <0.01        | 624          | 1307.75      | 1          | <0.01      | 702          | 1308.75      | 1             |
| Single Solution |                | #reactions | #signals   | #scenarios | #inputs  | OPT_SUBGRAPH |              |              | OPT_GRAPH  |            |              |              |               |
|                 |                |            |            |            |          | CPU time     | #variables   | #constraints | #solutions | CPU time   | #variables   | #constraints | #tested edges |
|                 | EGFR data      | 18         | 11         | 16         | 6        | 0.08         | 2594         | 5612.00      | 1          | 19.40      | 2691         | 5837.40      | 298           |
|                 |                | 32         | 11         | 16         | 6        | 0.09         | 4192         | 9228.00      | 1          | 72.46      | 4289         | 9453.07      | 536           |
|                 |                | 42         | 11         | 16         | 6        | 0.10         | 5402         | 11948.00     | 1          | 283.89     | 5499         | 12172.90     | 860           |
|                 |                | 67         | 11         | 16         | 6        | 0.22         | 8547         | 18988.00     | 1          | 30879.20   | 8644         | 19212.50     | 2351          |
|                 | random data    | 18         | 11         | 16         | 6        | 0.06         | 2594         | 5612.00      | 1          | 75.31      | 2691         | 5837.40      | 298           |
|                 |                | 32         | 11         | 16         | 6        | 0.22         | 4192         | 9228.00      | 1          | 5076.05    | 4289         | 9453.07      | 536           |
|                 |                | 42         | 11         | 16         | 6        | 0.45         | 5402         | 11948.00     | 1          | 63662.5    | 5499         | 12172.90     | 860           |
|                 |                | 67         | 11         | 16         | 6        | 10.62        | 8547         | 18988.00     | 1          | >64000     | 8644         | 19212.00     | XXXX          |
|                 | more scenarios | 18         | 11         | 32         | 6        | 0.22         | 5170         | 11200.00     | 1          | 1740.87    | 5363         | 11650.80     | 298           |
|                 |                | 32         | 11         | 32         | 6        | 4.76         | 8352         | 18432.00     | 1          | >64000     | 8545         | 18881.90     | XXXX          |
| 42              |                | 11         | 32         | 6          | 26.95    | 10762        | 23872.00     | 1            | >64000     | 10955      | 24320.00     | XXXX         |               |
| 67              |                | 11         | 32         | 6          | 1404.15  | 17027        | 37952.00     | 1            | >64000     | 17220      | 38400.00     | XXXX         |               |
| more signals    | 18             | 13         | 16         | 6          | 0.07     | 2626         | 5676.00      | 1            | 44.51      | 2723       | 5901.40      | 298          |               |
|                 | 32             | 18         | 16         | 6          | 0.31     | 4304         | 9452.00      | 1            | 8134.02    | 4401       | 9677.07      | 536          |               |
|                 | 42             | 23         | 16         | 6          | 0.47     | 5594         | 12332.00     | 1            | >64000     | 5691       | 12556.80     | XXXX         |               |
|                 | 67             | 38         | 16         | 6          | 1.78     | 8979         | 19852.00     | 1            | >64000     | 9076       | 20076.00     | XXXX         |               |
| Enumeration     | EGFR data      | 18         | 11         | 16         | 6        | 0.38         | 2594         | 5618.00      | 6          | NA         | NA           | NA           | NA            |
|                 |                | 32         | 11         | 16         | 6        | 351.97       | 4192         | 9728.50      | >1000      | NA         | NA           | NA           | NA            |
|                 |                | 42         | 11         | 16         | 6        | 506.61       | 5402         | 12448.50     | >1000      | NA         | NA           | NA           | NA            |
|                 |                | 67         | 11         | 16         | 6        | 1083.83      | 8547         | 19488.50     | >1000      | NA         | NA           | NA           | NA            |
|                 | random data    | 18         | 11         | 16         | 6        | 30.42        | 2594         | 5828.00      | 216        | NA         | NA           | NA           | NA            |
|                 |                | 32         | 11         | 16         | 6        | 527.20       | 4192         | 9728.50      | >1000      | NA         | NA           | NA           | NA            |
|                 |                | 42         | 11         | 16         | 6        | 773.4        | 5402         | 12448.50     | >1000      | NA         | NA           | NA           | NA            |
|                 |                | 67         | 11         | 16         | 6        | 3836.3       | 8547         | 19488.50     | >1000      | NA         | NA           | NA           | NA            |
|                 | more scenarios | 18         | 11         | 32         | 6        | 8.98         | 5170         | 11204.9      | 8          | NA         | NA           | NA           | NA            |
|                 |                | 32         | 11         | 32         | 6        | 26687.3      | 8352         | 18931.00     | >1000      | NA         | NA           | NA           | NA            |
|                 |                | 42         | 11         | 32         | 6        | >64000       | 10762        | 23896.00     | XXXX       | NA         | NA           | NA           | NA            |
|                 |                | 67         | 11         | 32         | 6        | >64000       | 17027        | 37953.00     | XXXX       | NA         | NA           | NA           | NA            |
| more signals    | 18             | 13         | 16         | 6          | 245.95   | 2626         | 6176.50      | >1000        | NA         | NA         | NA           | NA           |               |
|                 | 32             | 18         | 16         | 6          | 415.46   | 4304         | 9952.50      | >1000        | NA         | NA         | NA           | NA           |               |
|                 | 42             | 23         | 16         | 6          | 1256.00  | 5594         | 12832.5      | >1000        | NA         | NA         | NA           | NA           |               |
|                 | 67             | 38         | 16         | 6          | 9886.82  | 8979         | 20352.50     | >1000        | NA         | NA         | NA           | NA           |               |
