# Supplementary material for: Detecting and Removing Inconsistencies between Experimental Data and Signaling Network Topologies Using Integer Linear Programming on Interaction Graphs
Source: PLOS journal article supplement (doi:10.1371/journal.pcbi.1003204), 2013-09-05
Supplement: S7 (10.1371/journal.pcbi.1003204.s007) [file journal.pcbi.1003204.s007]

301 Moved Permanently

# Moved Permanently

The document has moved here.

---

Apache Server at www.ploscompbiol.org Port 80
