# Supplementary material for: Detecting and Removing Inconsistencies between Experimental Data and Signaling Network Topologies Using Integer Linear Programming on Interaction Graphs
Source: PLoS Comput Biol. 2013 Sep 5;9(9):e1003204. doi: 10.1371/journal.pcbi.1003204 (PMC3764019; doi:10.1371/journal.pcbi.1003204)
Supplement: Table S1 — Optimal model structures derived from the compressed EGFR/ErbB model by OPT_SUBGRAPH with enumeration. (PDF) [file pcbi.1003204.s004.pdf]

**Table S1**

| <b>Removed edges</b> | Solution 1 | Solution 2 | Solution 3 | Solution 4 | Solution 5 | Solution 6 |
|----------------------|------------|------------|------------|------------|------------|------------|
| pi3k→rac_cdc42       | 1          | 1          | 1          | 1          | 1          | 1          |
| rac_cdc42→mek12      | 1          |            | 1          |            |            |            |
| rac_cdc42→p38        |            |            |            |            |            |            |
| tgfa→rac_cdc42       |            |            |            |            |            |            |
| tgfa → pi3k          |            |            |            |            |            |            |
| tgfa → mek12         |            |            |            | 1          | 1          |            |
| pi3k → akt           |            |            |            |            |            |            |
| p90rsk → creb        | 1          | 1          |            | 1          |            |            |
| p90rsk → gsk3        |            |            |            |            |            |            |
| akt → gsk3           |            |            |            |            |            |            |
| rac_cdc42 → jnk      |            |            |            |            |            |            |
| p38 → hsp27          |            |            |            |            |            |            |
| p38 → creb           |            |            | 1          |            | 1          | 1          |
| mek12 → erk12        |            |            |            |            |            |            |
| jnk → p70s6_1        |            |            |            |            |            |            |
| erk12 → p70s6_1      | 1          | 1          | 1          | 1          | 1          | 1          |
| erk12 → p90rsk       |            |            |            |            |            |            |
| tgfa → stat3         | 1          | 1          | 1          | 1          | 1          | 1          |

**Table S1. Optimal model structures derived from the compressed EGFR/ErbB model by OPT\_SUBGRAPH with enumeration.** The complete set of optimal subgraphs that fit the measured data in Figure 3 is shown. The first column shows the complete list of edges included in the compressed network. Columns 2–7 denote with an entry of “1” whether the respective edge was removed by the optimization procedure.
